# Supplementary material for: NDR and spin-polarized transport properties of magnetic Fe sandwiched C60-GNR single molecule devices: theoretical insight
Source: Royal Society of Chemistry journal article supplement (doi:10.1039/d3nj05409h), 2024-01-01
Supplement: d3nj05409h1.pdf [file d3nj05409h1.pdf]

## NDR and spin-polarized transport properties of magnetic Fe sandwiched C<sub>60</sub>-GNR single molecule devices: theoretical insight

Xiaohui Liu, Yan Shang,\* Yangyang Hu, Zhaodi Yang, Ya Wang, Lei Pei, Hong Yu, Munir Ur Rehman, Yuqi Dong, Lu Han, Guiling Zhang\*

School of Materials Science and Engineering, Harbin University of Science and Technology, Harbin, 150080, China. E-mail: shangyan1972@126.com, guiling-002@163.com

### List of content:

1. Figure S1 Spin-resolved MPSH HOMO and LUMO of the **AIA'** device under various bias. (a) and (b) are for up-spin and down spin channels, respectively.
2. Figure S2 Spin-resolved MPSH HOMO and LUMO of the **BIA'** device under various bias. (a) and (b) are for up-spin and down spin channels, respectively.
3. Figure S3 Spin-resolved MPSH HOMO and LUMO of the **BIB'** device under various bias. (a) and (b) are for up-spin and down spin channels, respectively.
4. Figure S4 Spin-resolved MPSH HOMO and LUMO of the **ABIA'B'** device under various bias. (a) and (b) are for up-spin and down spin channels, respectively.
5. Figure S5 Spin-resolved MPSH HOMO and LUMO of the **BIIA'** device under various bias. (a) and (b) are for up-spin and down spin channels, respectively.
6. Figure S6 Spin-resolved MPSH HOMO and LUMO of the **BIIB'** device under various bias. (a) and (b) are for up-spin and down spin channels, respectively.
7. Figure S7 Spin-resolved MPSH HOMO and LUMO of the **ABIIA'B'** device under various bias. (a) and (b) are for up-spin and down spin channels, respectively.
8. Figure S8 Spin-resolved (a) LDOS and (b) effective potentials of the **AIA'** device under various biases.
9. Figure S9 Spin-resolved (a) LDOS and (b) effective potentials of the **BIA'** device under various biases.
10. Figure S10 Spin-resolved (a) LDOS and (b) effective potentials of the **BIB'** device under various biases.
11. Figure S11 Spin-resolved (a) LDOS and (b) effective potentials of the **ABIA'B'** device under various biases.
12. Figure S12 Spin-resolved (a) LDOS and (b) effective potentials of the **BIIA'** device under various biases.
13. Figure S13 Spin-resolved (a) LDOS and (b) effective potentials of the **BIIB'** device under various biases.
14. Figure S14 Spin-resolved (a) LDOS and (b) effective potentials of the **ABIIA'B'** device under various biases.

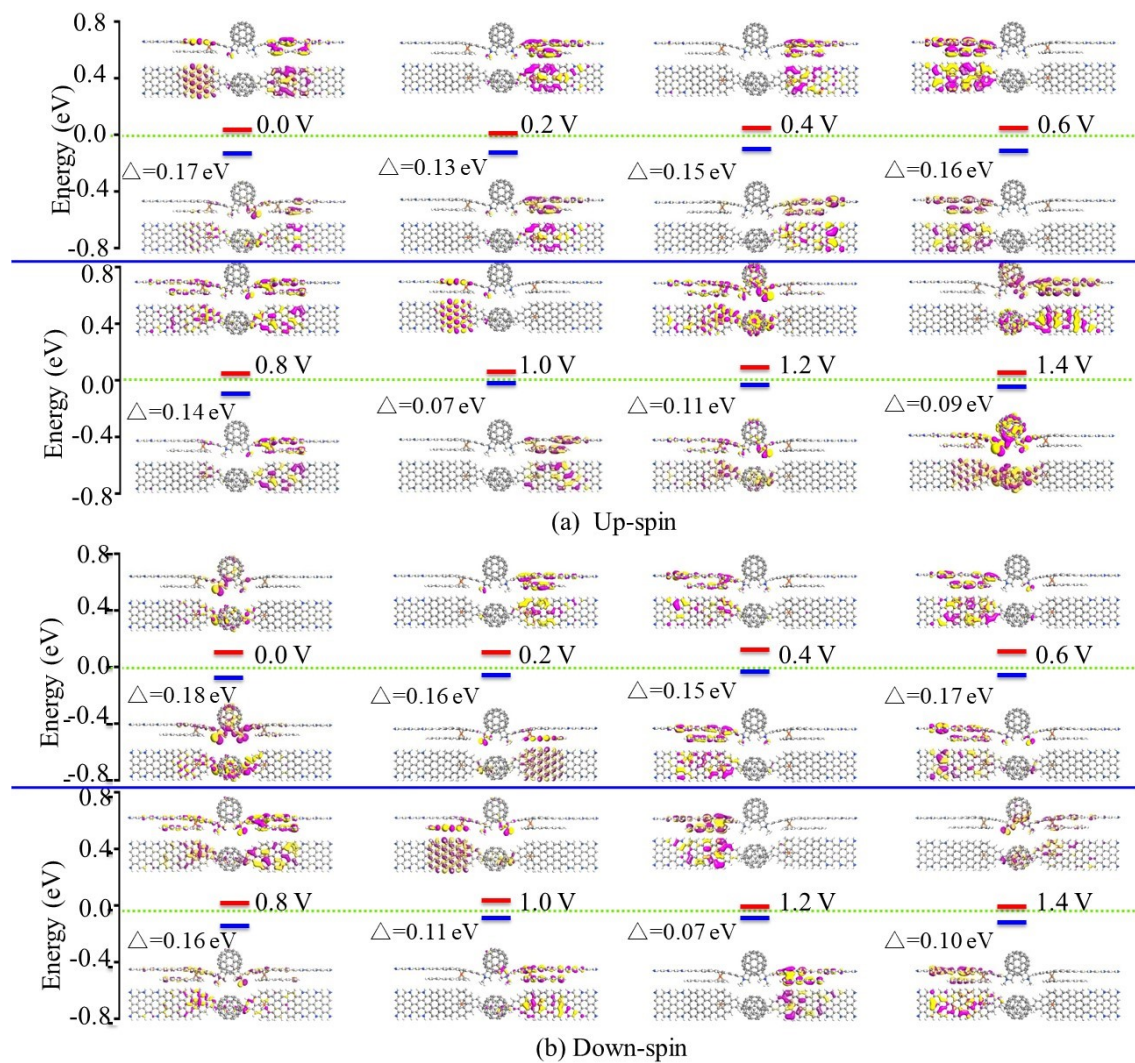

Figure S1 Spin-resolved MPSH HOMO and LUMO of the AIA' device under various bias. (a) and (b) are for up-spin and down spin channels, respectively.

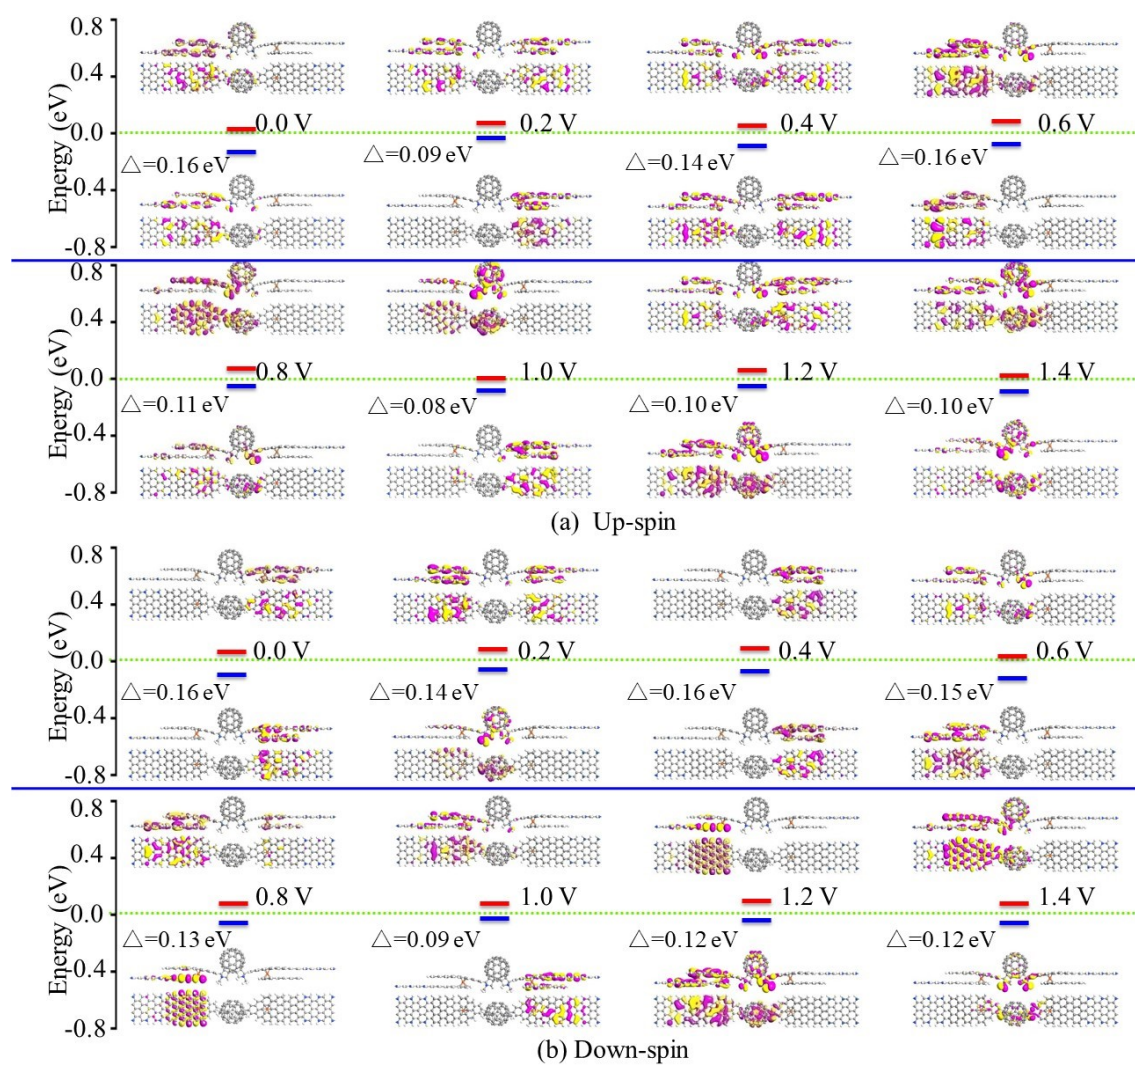

Figure S2 Spin-resolved MPSH HOMO and LUMO of the BIA device under various bias. (a) and (b) are for up-spin and down spin channels, respectively.

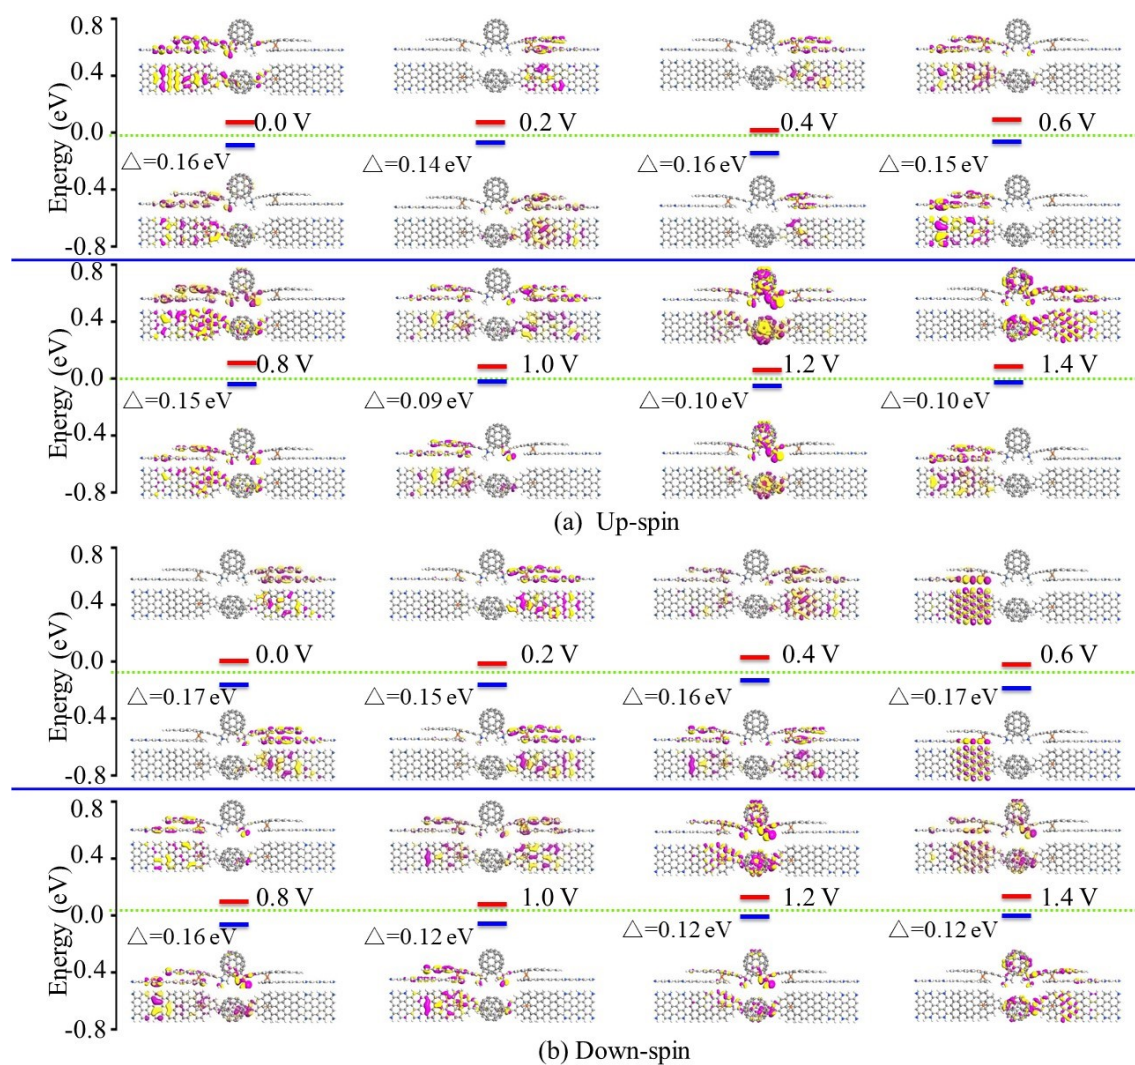

Figure S3 Spin-resolved MPSH HOMO and LUMO of the **BIB'** device under various bias. (a) and (b) are for up-spin and down spin channels, respectively.

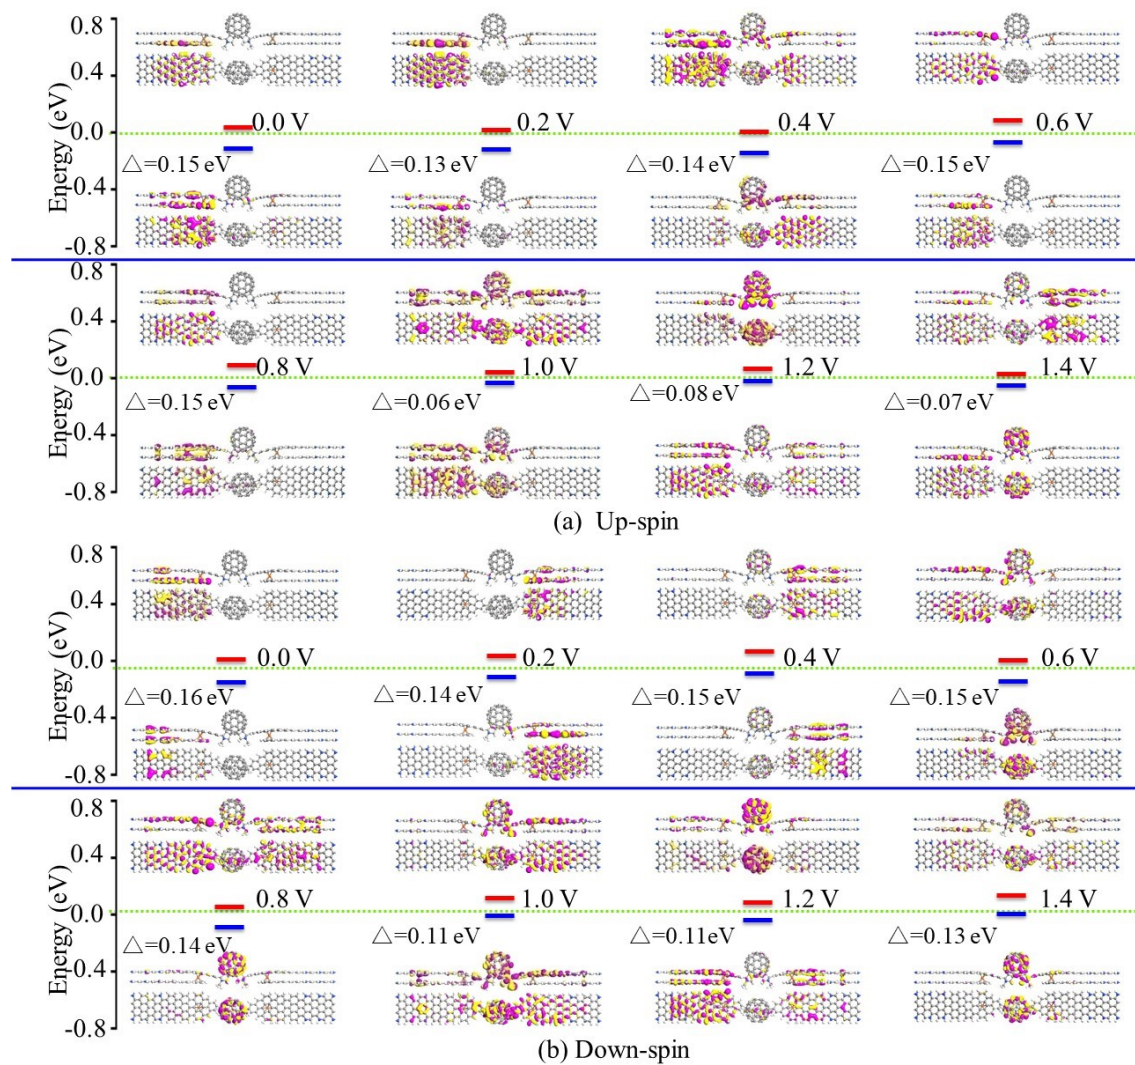

Figure S4 Spin-resolved MPSH HOMO and LUMO of the **ABIA 'B'** device under various bias. (a) and (b) are for up-spin and down spin channels, respectively.

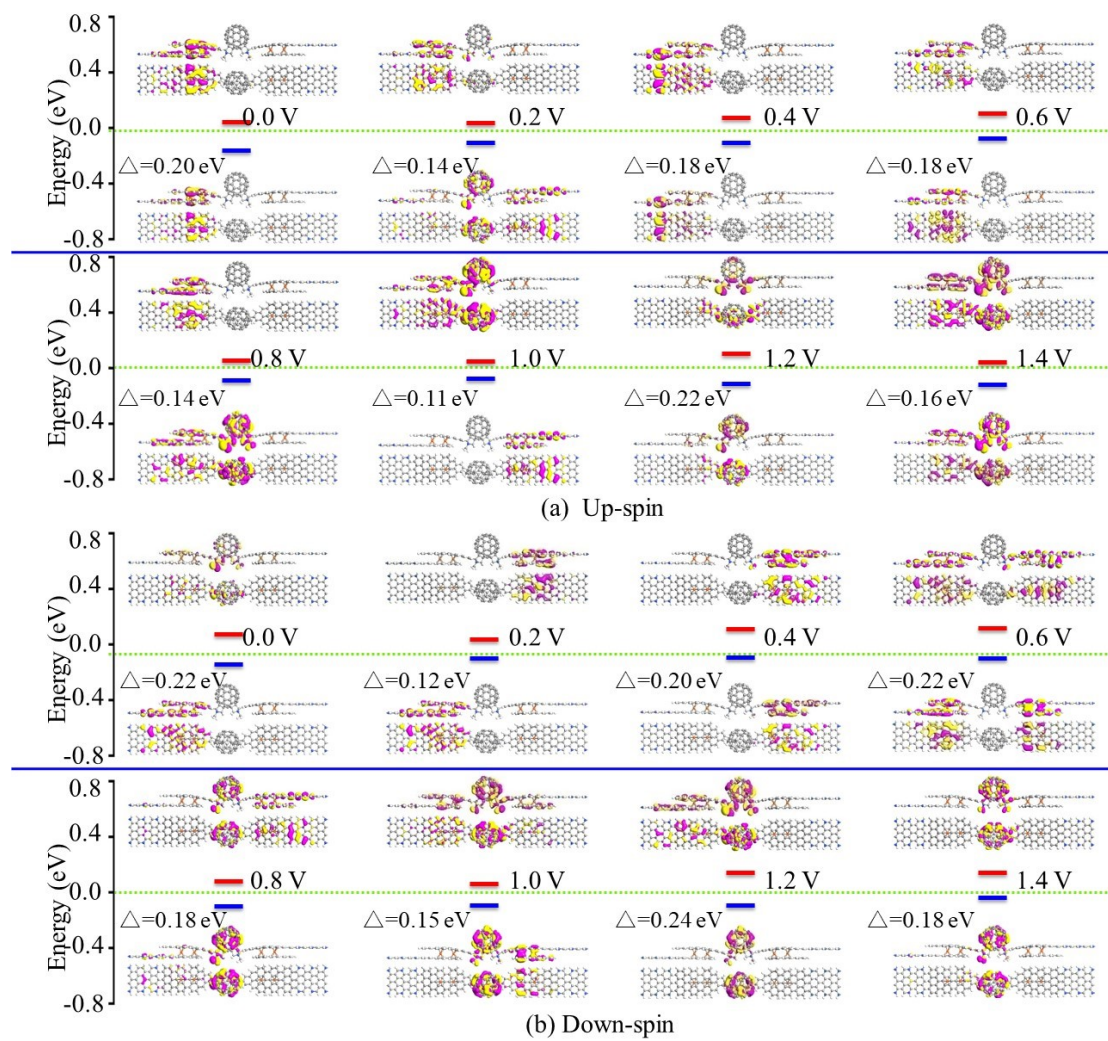

Figure S5 Spin-resolved MPSH HOMO and LUMO of the **BIIA'** device under various bias. (a) and (b) are for up-spin and down spin channels, respectively.

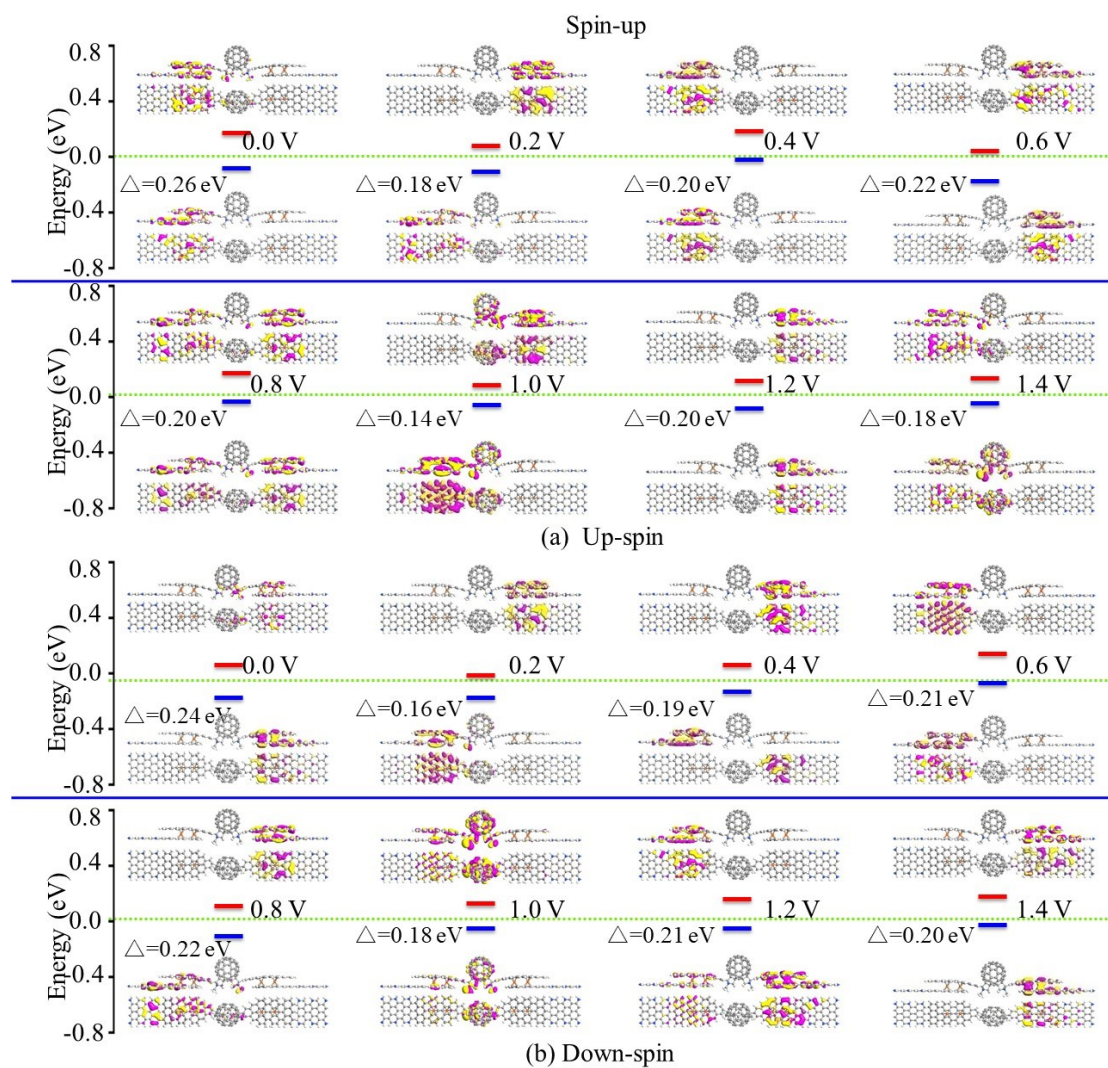

Figure S6 Spin-resolved MPSH HOMO and LUMO of the **BIIB'** device under various bias. (a) and (b) are for up-spin and down spin channels, respectively.

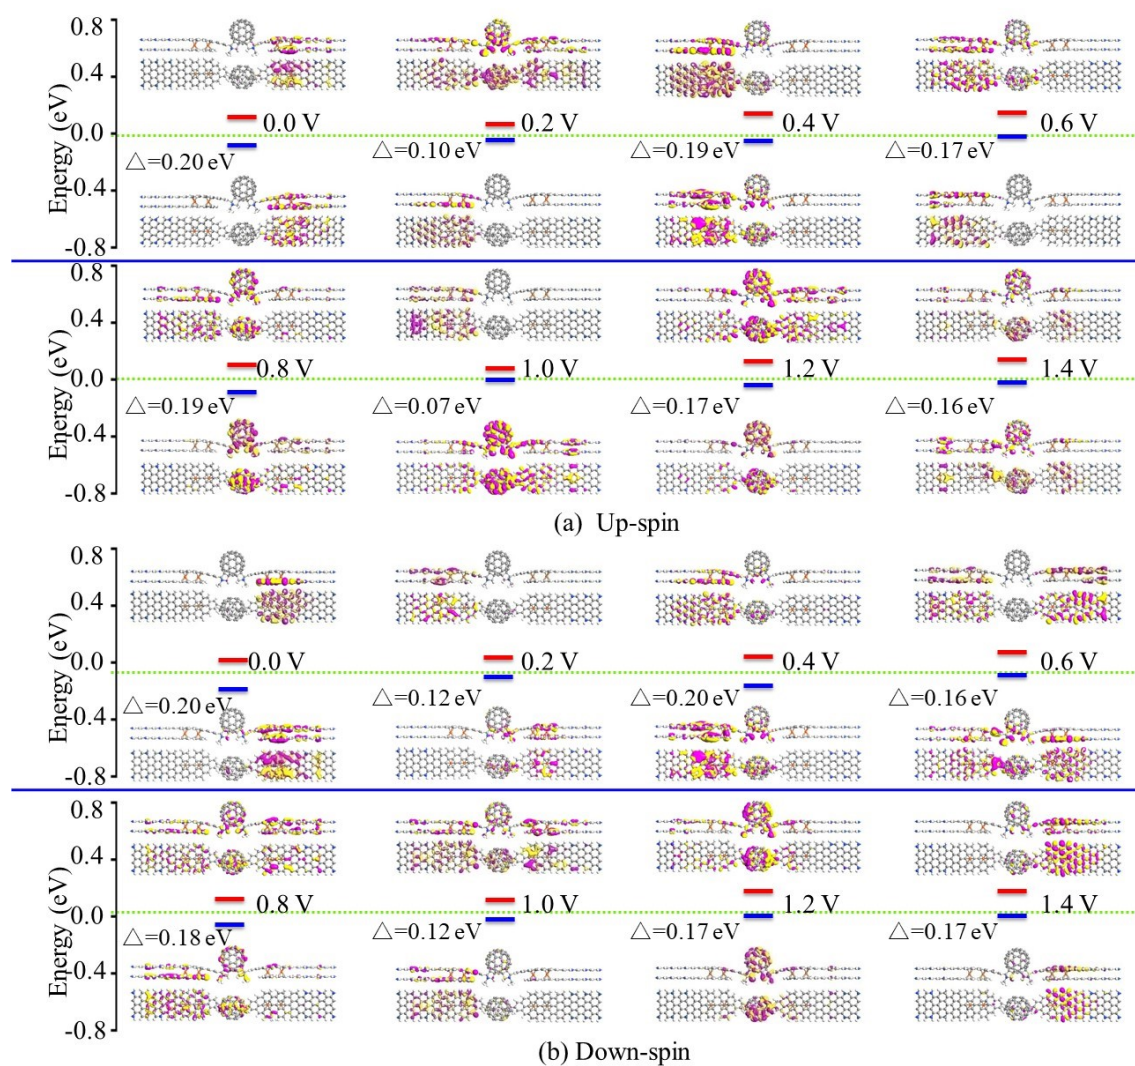

Figure S7 Spin-resolved MPSH HOMO and LUMO of the **ABIIA'B'** device under various bias. (a) and (b) are for up-spin and down spin channels, respectively.



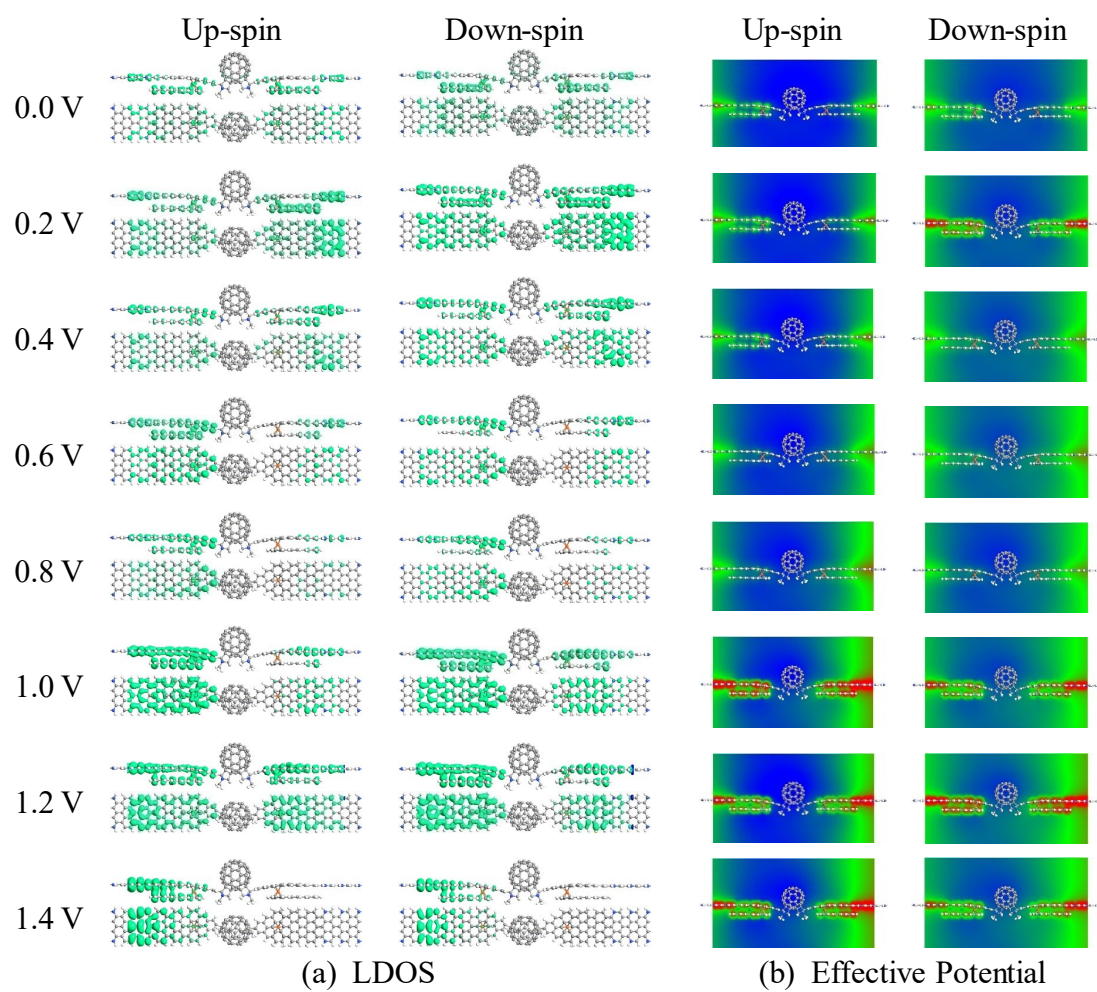

Figure S8 Spin-resolved (a) LDOS and (b) effective potentials of the AIA' device under various biases.

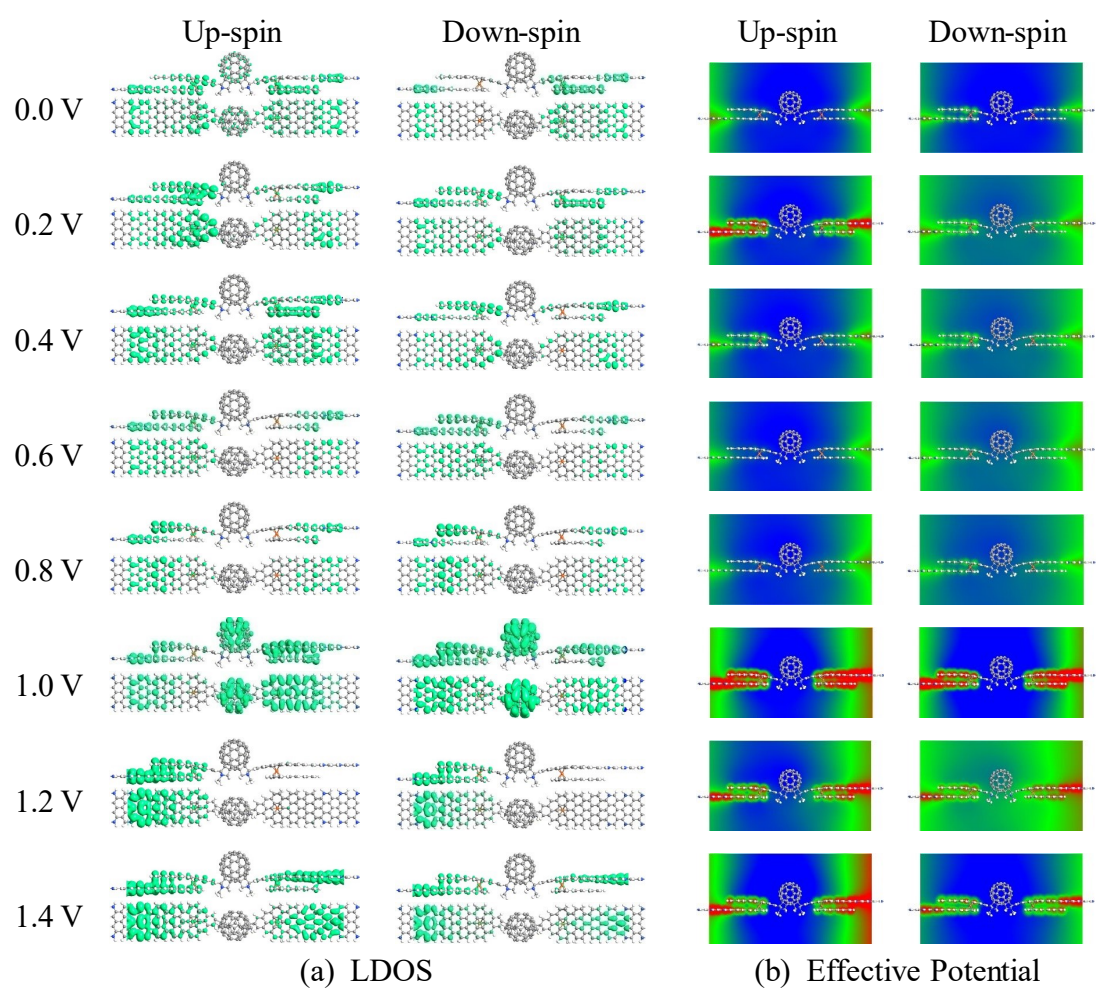

Figure S9 Spin-resolved (a) LDOS and (b) effective potentials of the **BIA'** device under various biases.

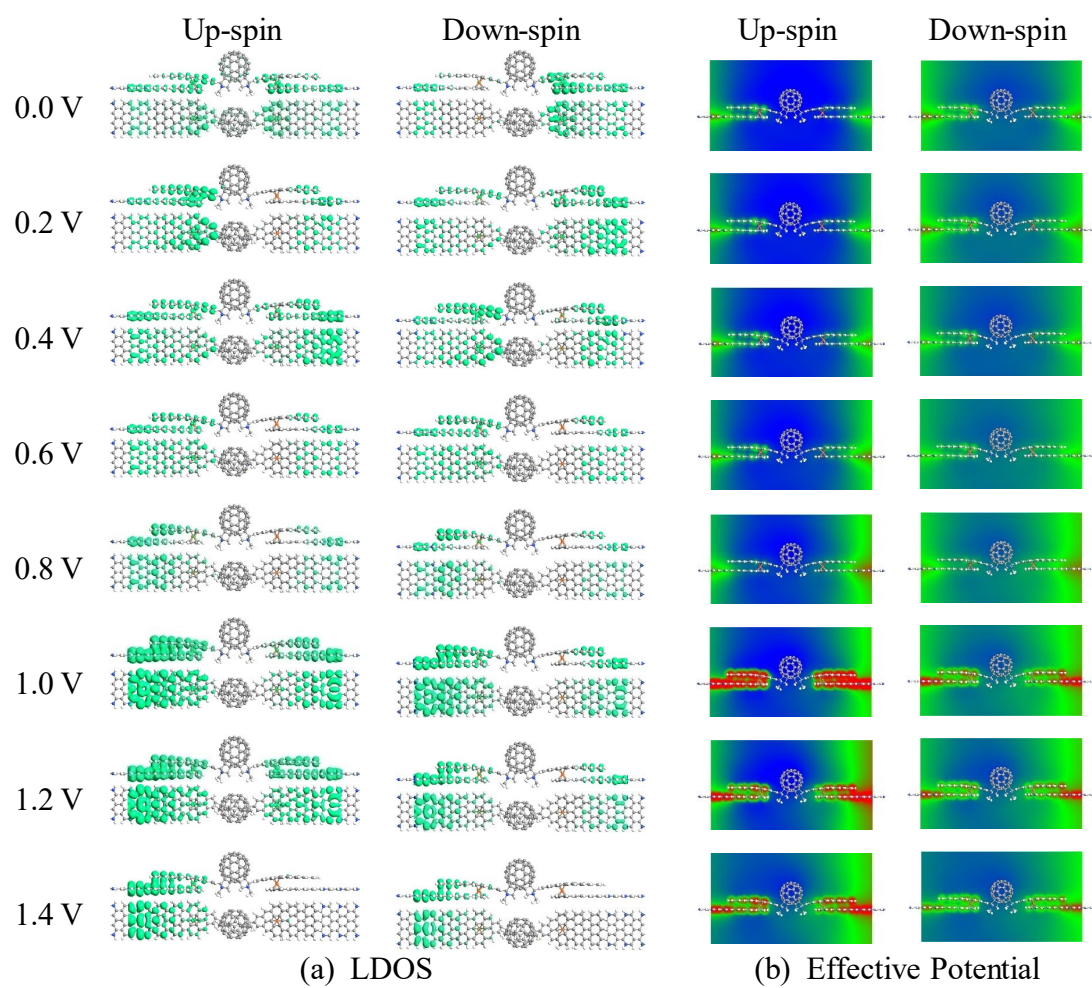

Figure S10 Spin-resolved(a) LDOS and (b) effective potentials of the **BIB'** device under various biases.

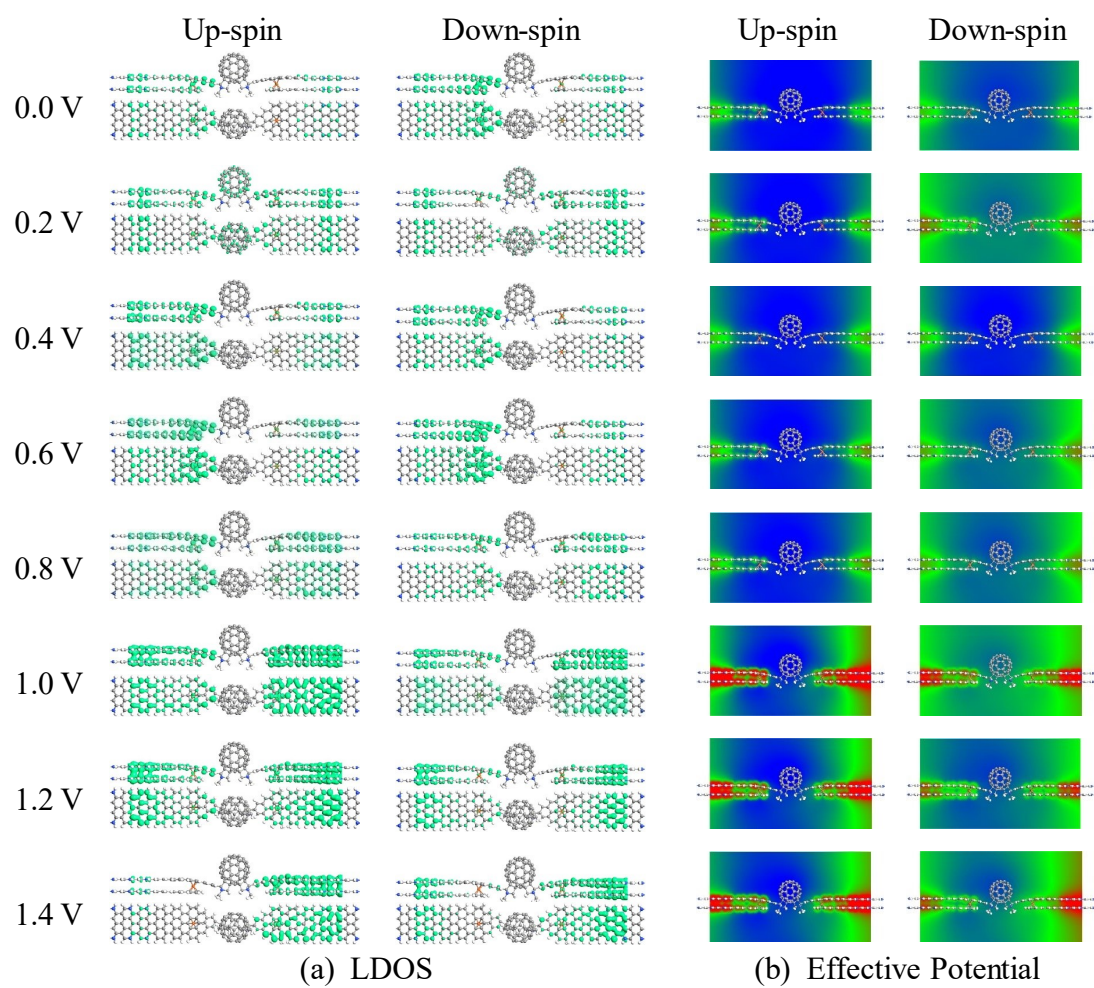

Figure S11 Spin-resolved(a) LDOS and (b) effective potentials of the ABIA'B' device under various biases.

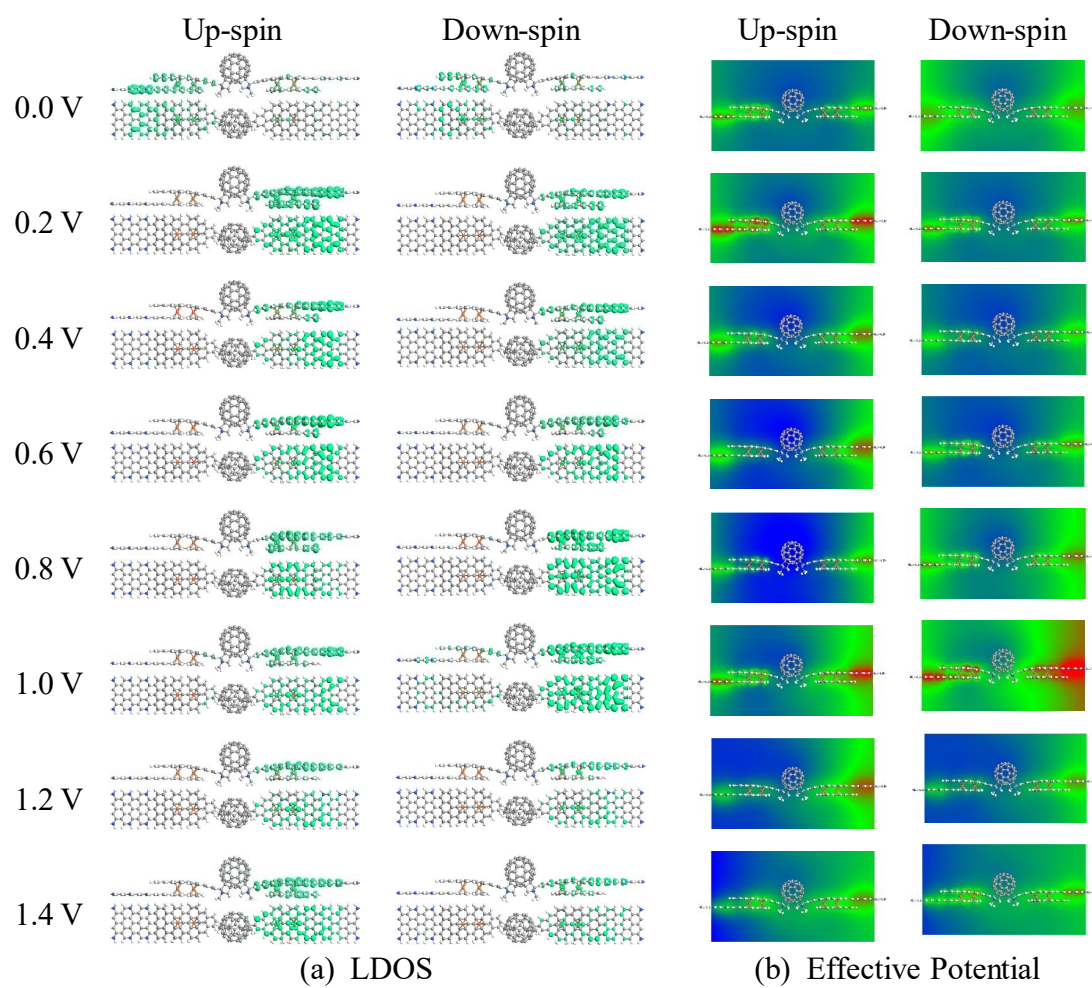

Figure S12 Spin-resolved (a) LDOS and (b) effective potentials of the **BIIA'** device under various biases.

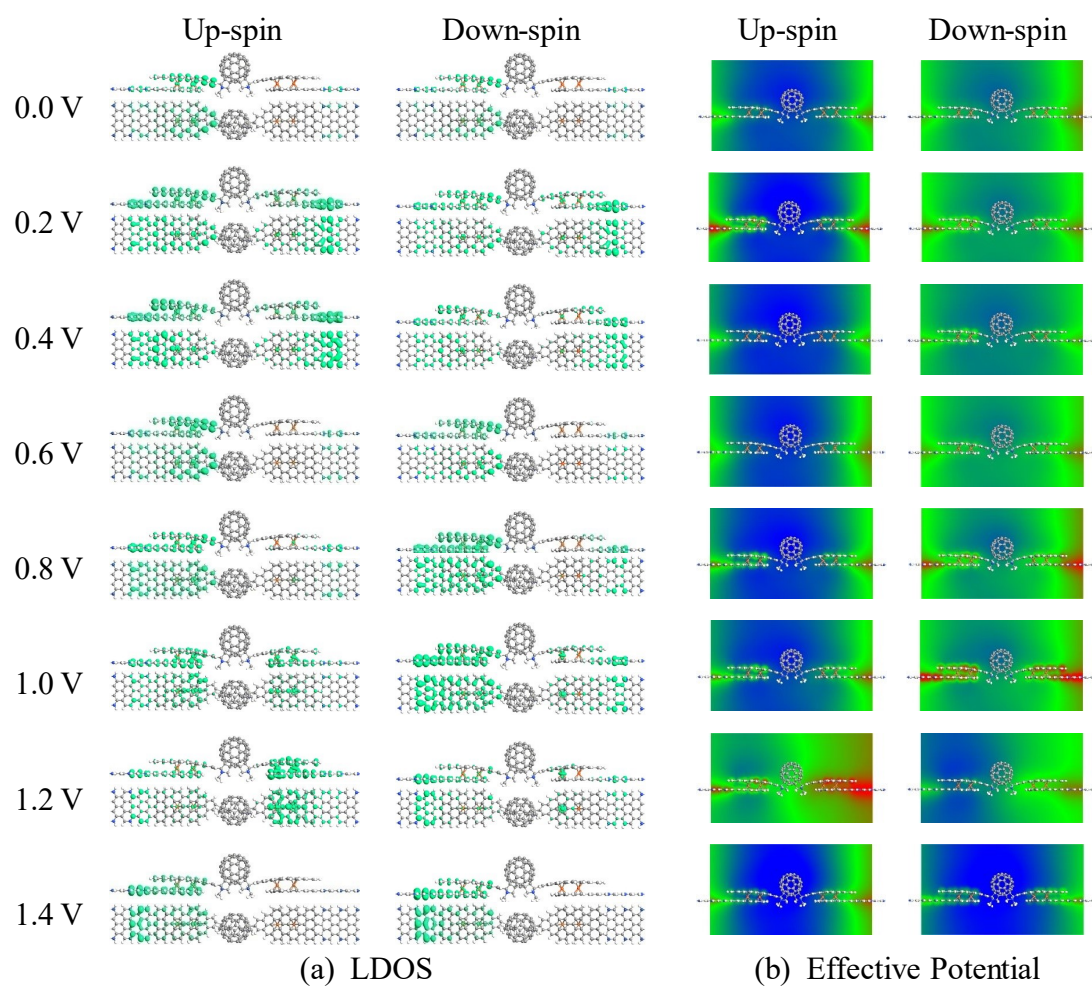

Figure S13 Spin-resolved (a) LDOS and (b) effective potentials of the **BIIB'** device under various biases.

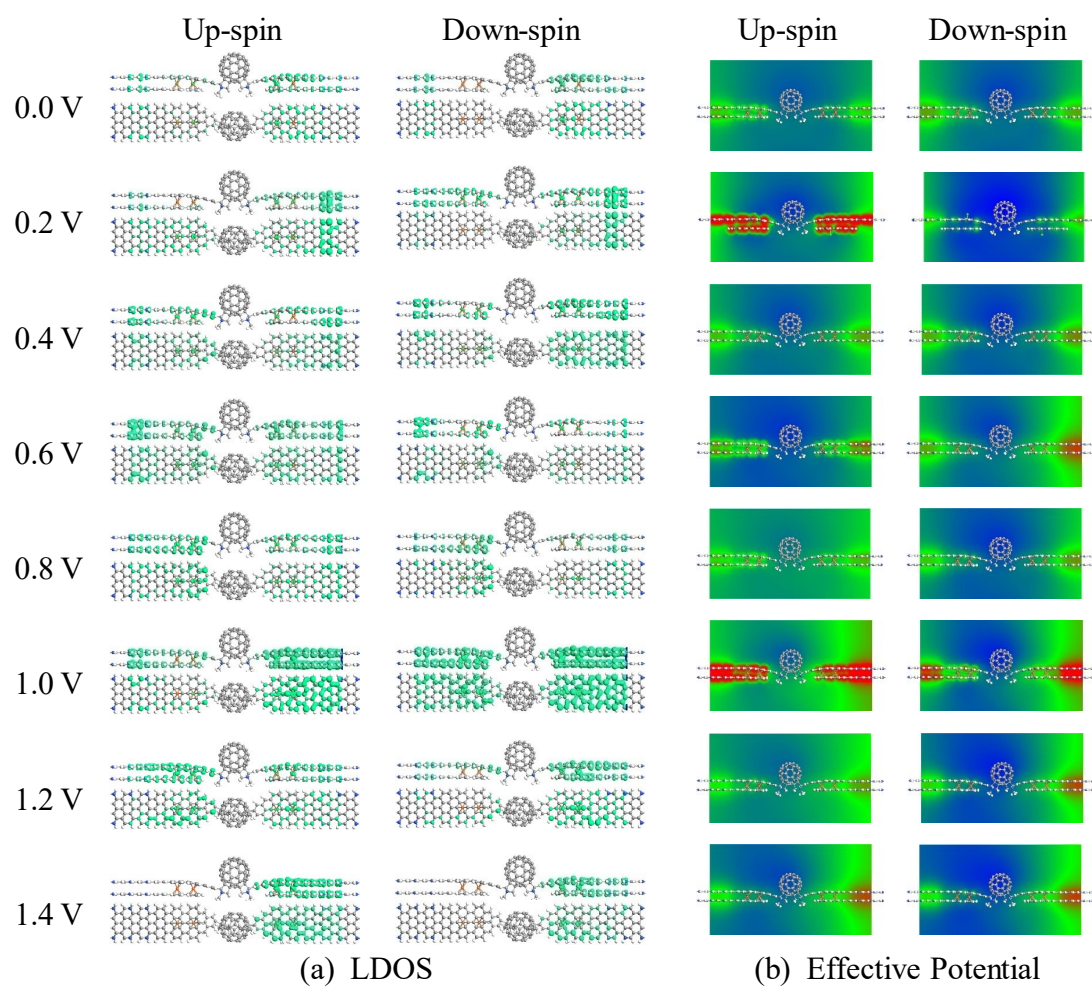

Figure S14 Spin-resolved (a) LDOS and (b) effective potentials of the **ABIIA'B'** device under various biases.
